1 **Modeling human age-associated increase in Gadd45y expression leads to spatial**  
2 **recognition memory impairments in young adult mice**

3 David V.C. Brito<sup>1</sup>, Kubra Gulmez Karaca<sup>1,3</sup>, Janina Kupke<sup>1</sup>, Franziska Mudlaff<sup>1</sup>, Benjamin  
4 Zeuch<sup>1,4</sup>, Rui Gomes<sup>2</sup>, Luísa V. Lopes<sup>2</sup>, Ana M.M. Oliveira<sup>1\*</sup>

5

6 <sup>1</sup> Department of Neurobiology, Interdisciplinary Centre for Neurosciences (IZN), Heidelberg  
7 University, INF 366, 69120 Heidelberg, Germany

8 <sup>2</sup> Instituto de Medicina Molecular João Lobo Antunes, Faculdade de Medicina de Lisboa,  
9 Universidade de Lisboa, 1649-028 Lisbon, Portugal

10 <sup>3</sup> Present address: Department of Cognitive Neuroscience, Donders Institute for Brain,  
11 Cognition and Behaviour, Radboud University Medical Center Kapittelweg 29, 6525 EN  
12 Nijmegen, The Netherlands

13 <sup>4</sup> Present address: Directors' Research, European Molecular Biology Laboratory (EMBL),  
14 Meyerhofstrasse 1, 69117 Heidelberg, Germany

15

16

17

18 \* Corresponding author:

19 Ana MM Oliveira

20 Department of Neurobiology, Interdisciplinary Center for Neurosciences (IZN)

21 Heidelberg University

22 Im Neuenheimer Feld 366

23 69120 Heidelberg, Germany

24 Telephone: +49 6221 54 16510

25 Fax: +49 6221 54 16524

26 E-mail: oliveira@nbio.uni-heidelberg.de

27

28 **Abstract**

29 Aging is associated with the progressive decay of cognitive function. Hippocampus-  
30 dependent processes, such as the formation of spatial memory, are particularly vulnerable to  
31 aging. Currently, the molecular mechanisms responsible for age-dependent cognitive decline  
32 are largely unknown. Here, we investigated the expression and function of the growth arrest  
33 DNA damage gamma (Gadd45 $\gamma$ ) during aging and cognition. We report that Gadd45 $\gamma$   
34 expression is increased in the hippocampus of aged humans and that Gadd45 $\gamma$   
35 overexpression in the young adult mouse hippocampus compromises cognition. Moreover,  
36 Gadd45 $\gamma$  overexpression in hippocampal neurons disrupted CREB signaling and the  
37 expression of well-established activity-regulated genes. This work shows that Gadd45 $\gamma$   
38 expression is tightly controlled in the hippocampus and its disruption may be a mechanism  
39 contributing to age-related cognitive impairments observed in humans.

40

41 **Keywords:** Activity-regulated gene expression, age-related cognitive deficits, CREB,  
42 Gadd45 $\gamma$ , object location memory.

43

44

45

46

47

48

49

50

51

## 52        **1. Introduction**

53        Age-related cognitive decline in humans affects about 40% of individuals aged 65 years or  
54        older (Aigbogun et al., 2017), even though deterioration of cognitive functions may start  
55        earlier (Singh-Manoux et al., 2012). Long-term memory formation requires activity-regulated  
56        signaling that results in *de novo* gene expression. These genomic responses are known to  
57        be disrupted in the aged hippocampus (Stefanelli et al., 2018). Therefore, age-associated  
58        changes that dysregulate the coupling between neuronal activity and gene transcription likely  
59        underlie age-related cognitive deficits.

60        Recently, two studies showed that the growth arrest DNA damage gamma (*Gadd45γ*) is  
61        required for memory formation in the prelimbic prefrontal cortex (Li et al., 2018) and the  
62        hippocampus (Brito et al., 2019). Moreover, we found that aging reduces *Gadd45γ*  
63        expression in the mouse hippocampus and that mimicking this reduction in young adult mice  
64        induces age-like memory impairments (Brito et al., 2019). At the molecular level, *Gadd45γ* is  
65        required for CREB activation in response to neuronal activity and associated gene  
66        expression (Brito et al., 2019). In the current study, we found that in *postmortem* human  
67        hippocampal tissue from aged individuals, *Gadd45γ* expression levels are increased relative  
68        to young donors. Furthermore, we showed that increasing *Gadd45γ* levels in the mouse  
69        hippocampus led to impairments in memory formation, CREB activation and memory-related  
70        gene expression.

71        Overall, this work together with our previous findings (Brito et al., 2019), demonstrate a  
72        requirement for tight regulation of neuronal *Gadd45γ* levels in gene expression regulation  
73        and cognitive abilities. Thus, dysregulation of *Gadd45γ* expression might be an underlying  
74        mechanism involved in age-related cognitive impairments observed in mice and humans.

## 75        **2. Materials and Methods**

76        **2.1. Subjects.** The use of human samples was conducted in accordance with the  
77        Helsinki Declaration as well as national ethical guidelines. Protocols were approved by the  
78        Local Ethics Committee and the National Data Protection Committee. The biospecimens

79 were obtained 36h *postmortem* from healthy aged (60–65 years old) and young (21–22 years  
80 old) individuals by the Neuropathology lab (Temido-Ferreira et al., 2018). The tissue was  
81 processed and preserved for molecular analyses as previously described (Pliassova et al.,  
82 2016). Young adult male C57BL/6N mice (Charles River, Sulzfeld, Germany) were 3-months-  
83 old at the time of behavior experiments. Mice were group-housed (3-4 mice per cage) on a  
84 12h light/dark cycle ( $22 \pm 1^\circ\text{C}$ ,  $55 \pm 10\%$  relative humidity) with *ad libitum* access to water  
85 and food. All behavioral experiments took place during the light phase. All procedures were  
86 carried out in accordance with German guidelines for the care and use of laboratory animals  
87 and with the European Community Council Directive 86/609/EEC.

88 **2.2. Recombinant adeno-associated virus (rAAVs).** Viral particles were  
89 produced and purified as described previously (Zhang et al., 2007). Overexpression of  
90 Gadd45 $\gamma$  was achieved by using a viral vector that contained the mouse CamKII $\alpha$  promoter  
91 upstream of the Gadd45 $\gamma$  full-length mouse cDNA sequence. As a control vector, we used a  
92 construct containing the CamKII $\alpha$  promoter driving the expression of GFP. For each virus  
93 batch, toxicity was analyzed on primary hippocampal cultures before the start of the  
94 experiments. For this, different regions of the coverslip were imaged using identical  
95 microscope settings and the number of dead cells was quantified using Fiji (Schindelin et al.,  
96 2012) on day *in vitro* (DIV) 10.

97 **2.3. Primary hippocampal cultures.** Hippocampal cultures from newborn  
98 C57Bl/6N mice (Charles River, Sulzfeld, Germany) were prepared and maintained as  
99 previously described (Bading and Greenberg, 1991), except that growth medium was  
100 supplemented with B27 (Invitrogen/BRL, Waltham, USA) and 1% rat serum (vol/vol). rAAV  
101 infection of cultures occurred on DIV 4. Experiments were performed on DIV 10. To induce  
102 action potential bursting, cultures were treated with 50  $\mu\text{M}$  bicuculline (Enzo Life Sciences,  
103 Germany).

104 **2.4. Stereotaxic surgery.** rAAVs were injected into the dorsal hippocampus at the  
105 following coordinates relative to Bregma: – 2 mm anteroposterior,  $\pm 1.5$  mm medio-lateral, –  
106 1.7, – 1.9 and – 2.1 mm dorsoventral. A total volume of 1.5  $\mu\text{l}$  was injected per hemisphere

107 at 200 nl/min. Following injections at each individual site, the needle was left in place for 60s.  
108 Behavioral experiments started 2 weeks after rAAVs delivery. After behavioral testing,  
109 histological analysis was performed to confirm tissue and cellular integrity.

110 **2.5. Behavioral testing.** Before behavioral testing started, mice were habituated  
111 to the experimenter and behavioral room by handling for 3 consecutive days, 1 minute per  
112 mouse. Object-location test and contextual fear conditioning were performed as previously  
113 described (Oliveira et al., 2012; Oliveira et al., 2016). The open field test was carried out  
114 within the first session of the object-place recognition training as previously described  
115 (Gulmez Karaca et al., 2018).

116 **2.6. Quantitative reverse-transcription PCR.** Total RNA from human tissue was  
117 extracted and cDNA produced as previously described (Temido-Ferreira et al., 2018). For  
118 RNA isolation from mouse hippocampal tissue, the tissue was rapidly dissected, placed in  
119 RNAlater (Sigma, Munich, Germany) and isolated using the RNeasy Plus Mini Kit (Qiagen,  
120 Hilden, Germany) with additional on-column DNase I digestion, according to the  
121 manufacturer's instructions. cDNA production and quantitative reverse-transcription PCR (q-  
122 RT-PCR) was performed as previously described (Brito et al., 2019). The following TaqMan  
123 probes were used: *Arc* (Mm00479619\_g1), *c-Fos* (Mm00487425\_m1), *FosB*  
124 (Mm00500401\_m1), *Gadd45 $\alpha$*  (Mm00432802\_m1), *Gadd45 $\beta$*  (Mm00345123\_m1), *Gadd45 $\gamma$*   
125 (Mm00442225\_m1), *Egr1* (Mm00656724\_m1) and *Npas4* (Mm00463644\_m1). For human  
126 genes the following TaqMan probes were used: *Gadd45 $\alpha$*  (Hs00169255\_m1), *Gadd45 $\beta$*   
127 (Hs00169587\_m1), *Gadd45 $\gamma$*  (Hs00198672\_m1). Expression levels of target genes were  
128 normalized to the expression of the housekeeping gene *GusB* (Mm00446953\_m1) or  $\beta$ -actin  
129 (Hs01060665\_g1) for mouse or human genes, respectively. Controls were used to exclude  
130 the possibility of DNA or RNA contaminations.

131 **2.7. Western blotting.** Western blotting was performed as previously described  
132 (Brito et al., 2019). Briefly, hippocampal cultures infected on DIV 4 were lysed on DIV 10 in  
133 SDS sample buffer. After SDS page, gels were blotted onto a nitrocellulose membrane (GE  
134 Healthcare, Buckinghamshire, UK) and later blocked in 5% milk and probed with the

135 following antibodies: phospho-CREB (1:6000, Millipore #05-667), total-CREB (1:5000, Cell  
136 Signaling, #4820) or  $\alpha$ -Tubulin (1:40000, Sigma-Aldrich, #T9026). Antibodies were diluted in  
137 5% milk in PBS-T (total-CREB and  $\alpha$ -Tubulin) or in 5% bovine serum albumin in PBS-T  
138 (phospho-CREB). Next, the membranes were incubated with horseradish peroxidase-  
139 conjugated secondary antibodies and later analyzed using a ChemiDoc™ Imaging System  
140 (Bio-Rad). Data is presented as ratio of phosphorylated/total protein normalized internally to  
141 each uninfected condition.

142 **2.8. Statistical information.** For normally distributed data sets, two-tailed  
143 unpaired Student's t test or one-way ANOVA were used to compare two or more groups  
144 respectively (significant data is marked with \*). Two-tailed Mann-Whitney test was used to  
145 compare two distinct groups for non-Gaussian distribution (significant data is marked with #).  
146 Correlation analysis was performed using Pearson correlation coefficient or Spearman  
147 correlation for normally distributed or non-parametric data, respectively. The sample size was  
148 determined based on similar experiments carried out in the past. All plotted data represent  
149 mean  $\pm$  SEM. Statistics were performed using GraphPad Prism for Mac OS X, version 8. For  
150 behavioral experiments the investigators were blind to group allocation during data collection  
151 and analysis. For *in vitro* experiments no blinding was performed since the outcome was  
152 dependent on software analysis and not manual scoring.

### 153 **3. Results**

#### 154 **3.1. Aging increases Gadd45 $\gamma$ expression in the human hippocampus.**

155 Aberrant gene expression patterns are an evolutionarily conserved hallmark of aging.  
156 However, no overall correlation between age-associated gene expression in mice and  
157 humans has been detected (Zahn et al., 2007). We asked whether Gadd45 $\gamma$  expression in  
158 human aged hippocampus would be compromised as observed in mice (Brito et al., 2019).  
159 We analyzed the expression of Gadd45 family members in young and aged human  
160 hippocampi as we previously described (21–65 years old) (Temido-Ferreira et al., 2018)  
161 (Figure 1A). We did not find any correlation between age and Gadd45 $\alpha$  expression.  
162 Interestingly, we found that hippocampal Gadd45 $\beta$  and Gadd45 $\gamma$  levels were increased (~4.8

163 and ~8.6 fold, respectively) as age progressed. This result, together with our previous  
164 findings in aged mouse tissue (Brito et al., 2019), suggests that age-related Gadd45  
165 expression changes in the hippocampus may not be conserved in mice and humans.

### 166 **3.2. Gadd45 $\gamma$ overexpression leads to impairments in spatial recognition**

167 **memory.** Next, we sought to model the human aging-associated Gadd45 $\gamma$  increase in the  
168 mouse hippocampus and determine the cellular and behavioral consequences of neuronal  
169 Gadd45 $\gamma$  overexpression. Given that previous studies showed a selective function for  
170 Gadd45 $\gamma$  in memory formation (Brito et al., 2019; Li et al., 2018), we focused on Gadd45 $\gamma$ .  
171 We stereotaxically delivered a viral vector containing the mouse CamKII $\alpha$  promoter driving  
172 the expression of Gadd45 $\gamma$ , or GFP as a control, into the dorsal hippocampus (dHPC) of  
173 young adult mice (Figure 1B,C). We validated viral expression in the dHPC of injected  
174 animals by assessing GFP expression and *Gadd45 $\gamma$*  mRNA levels (Figure S1A-C). Neither  
175 groups showed anatomical or histological brain abnormalities. Two weeks after stereotaxic  
176 surgery, before assessing cognitive function, we performed an open field test (Figure 1C) to  
177 verify whether Gadd45 $\gamma$  overexpression affects locomotor activity or anxiety-like behavior.  
178 Total distance travelled and the percentage of the time spent in the central zone were similar  
179 between groups (Figure 1D-F). Next, we assessed long-term memory in the object-place  
180 recognition test and contextual fear conditioning. Increasing Gadd45 $\gamma$  expression in the  
181 dHPC of young mice impaired preference for the displaced object 24h after learning (Figure  
182 1G). This impairment was not due to altered habituation patterns during the training trial  
183 sessions or altered object exploratory behavior (Figure S1D-E). In contrast, Gadd45 $\gamma$ OE  
184 mice showed intact long-term memory in contextual fear conditioning (Figure 1H). Both  
185 groups presented similar responses to shock administration (Figure S1F).

### 186 **3.3. Gadd45 $\gamma$ overexpression disrupts activity-dependent CREB activation**

187 **and gene expression.** Considering that Gadd45 $\gamma$  regulates CREB activity (Brito et al.,  
188 2019), we next investigated whether Gadd45 $\gamma$  overexpression would impact this cellular  
189 response. We addressed this by overexpressing Gadd45 $\gamma$  in primary hippocampal cultures  
190 (Figure S1G,H) and by measuring the phosphorylation levels of CREB in baseline conditions

191 and in response to increased neuronal activity (Figure 2A). As expected, in control conditions  
192 there was an activity-dependent increase in CREB phosphorylation (Figure 2B-C). Gadd45y  
193 overexpression in baseline conditions led to increased levels of CREB phosphorylation  
194 (Figure 2B-C). This result is consistent with the recent report that Gadd45y regulates CREB  
195 activation (Brito et al., 2019). Moreover, upon Gadd45y overexpression, activity-induced  
196 CREB phosphorylation did not reach control levels (Figure 2B-C). We next assessed the  
197 expression of the CREB-dependent genes *Arc*, *FosB*, *c-Fos*, *Egr1* and *Npas4* (Impey et al.,  
198 2004; Rao-Ruiz et al., 2019) in basal conditions and upon neuronal activity (Figure 2D-I).  
199 Hippocampal neuronal cultures infected with rAAV-Gadd45yOE revealed disrupted CREB-  
200 dependent gene expression in response to increased neuronal activity compared to control  
201 conditions (Figure 2E-I). This set of experiments shows that increasing Gadd45y above  
202 physiological levels in hippocampal neurons disrupts CREB phosphorylation and gene  
203 expression required for memory formation. Taken together, these findings demonstrate that  
204 an increase in hippocampal Gadd45y levels disrupts the expression of memory-related  
205 genes and cognitive function.

#### 206 **4. Discussion**

207 This study suggested that human aging is associated with increased hippocampal Gadd45y  
208 expression. Together with our previous findings (Brito et al., 2019) we showed that  
209 bidirectional dysregulation of hippocampal Gadd45y levels in young adult mice negatively  
210 impacts cognitive function and the expression of memory-related genes. Thus, implicating a  
211 requirement for tight control of Gadd45y levels in brain function.

212 We observed that mimicking the human aging-related increase in Gadd45y expression in the  
213 mouse hippocampus or in dissociated hippocampal neurons, promoted memory deficits and  
214 impairments in CREB-dependent gene transcription, respectively. Reduction or chronic  
215 enhancement of CREB function is known to lead to spatial memory deficits (Li et al., 2015;  
216 Pittenger et al., 2002; Viosca et al., 2009). This effect is observed in both CREB-deficient  
217 mutants (Pittenger et al., 2002) and models that use constitutively active forms of CREB  
218 such as VP16-CREB (Viosca et al., 2009). Moreover, constitutive CREB activation has been



219 identified as a possible contributing mechanism involved in Alzheimer's disease (Muller et al.,  
220 2011). Gadd45y overexpression induced increases in CREB phosphorylation in basal  
221 conditions and impairments in CREB activation and expression of plasticity-related genes in  
222 response to neuronal activity. Together with our previous findings that showed that Gadd45y  
223 knockdown leads to impairments in CREB activation and associated gene expression (Brito  
224 et al., 2019), this data suggests that proper cellular function requires the tight regulation of  
225 Gadd45y levels. These findings are in agreement with another study showing that either  
226 Gadd45y loss- or gain-of-function disrupts neural development (Kaufmann and Niehrs,  
227 2011).

228 The deficits in memory were task-specific; young adult mice expressing Gadd45y above  
229 physiological levels presented selective long-term memory impairments in object place-  
230 recognition memory but not in contextual fear conditioning. Intriguingly, similar results have  
231 been found in aged mice and humans. It has been described that aged mice (Kennard and  
232 Woodruff-Pak, 2011) and humans (Battaglia et al., 2018; Foster et al., 2012; Leal and Yassa,  
233 2015) are more likely to display deficits in forms of recognition memory than in contextual  
234 fear conditioning. The reasons for the selective impairment may be attributed to the  
235 characteristics of the tasks; despite hippocampal dysfunction in response to aging or  
236 Gadd45y overexpression, mice may still be able to form and store the association between a  
237 highly salient stimulus (novel context) and a foot-shock. Similar findings have been described  
238 for other models of impaired hippocampal function. Namely, in a mouse model of Rett  
239 syndrome (Gulmez Karaca et al., 2018) and Alzheimer's disease (Corcoran et al., 2002). In  
240 the later, contextual fear conditioning impairments were only present when the salience of  
241 the context was reduced.

242 Aberrant gene transcription patterns occur as a consequence of aging in the hippocampus  
243 (Burger, 2010; Janov et al., 2017; Verbitsky et al., 2004). These changes do not overly  
244 correlate across species (Bishop et al., 2010; Loerch et al., 2008; Zahn et al., 2007), thus  
245 limiting the translational potential of animal models. Studies comparing cross-species  
246 alterations in gene expression generally focus on shared changes. The similar

247 consequences of bidirectional dysregulation of Gadd45 $\gamma$  expression levels suggest that this  
248 approach may neglect functionally relevant and seemingly disparate age-associated  
249 transcription changes. Using *in vivo* and *in vitro* models we show that hippocampal levels of  
250 Gadd45 $\gamma$  are tightly regulated and that either a decrease (Brito et al., 2019) or an increase in  
251 Gadd45 $\gamma$  can dysregulate plasticity-associated gene expression and cause cognitive  
252 impairments. Accordingly, our findings illustrate a scenario in which diverging age-related  
253 transcriptional programs in mice and humans result in converging phenotypes.

254 Taken together, our results demonstrate the requirement for tight control of Gadd45 $\gamma$  levels  
255 in memory formation and further implicate Gadd45 $\gamma$  as a molecular candidate that may  
256 underlie cognitive impairments in aging-associated pathological conditions.

### 257 **Acknowledgements**

258 We thank I. Bunnzli-Ehret for the preparation of primary hippocampal cultures and Stephanie  
259 Zeuch for comments to the manuscript. This work was supported by the Deutsche  
260 Forschungsgemeinschaft (DFG) [SFB 1134 (C01), OL 437/1 to A.M.M.O.], by Chica and  
261 Heinz Schaller foundation fellowship to A.M.M.O. and by Santa Casa da Misericórdia  
262 Mantero Belard Award [MB-07-2018 to L.V.L.].

### 263 **Disclosure statement**

264 The authors declare no conflict of interest.

### 265 **References**

- 266 Aigbogun, M.S., Stelhorn, R., Krasa, H., Kostic, D., 2017. Severity of memory impairment in the elderly: Association with health  
267 care resource use and functional limitations in the United States. *Alzheimer's & dementia (Amsterdam, Netherlands)* 8, 51-59.  
268 Bading, H., Greenberg, M.E., 1991. Stimulation of protein tyrosine phosphorylation by NMDA receptor activation. *Science (New*  
269 *York, N.Y.)* 253(5022), 912-914.  
270 Battaglia, S., Garofalo, S., di Pellegrino, G., 2018. Context-dependent extinction of threat memories: influences of healthy aging.  
271 *Scientific reports* 8(1), 12592.  
272 Bishop, N.A., Lu, T., Yankner, B.A., 2010. Neural mechanisms of ageing and cognitive decline. *Nature* 464(7288), 529-535.  
273 Brito, D.V.C., Kupke, J., Gulmez Karaca, K., Zeuch, B., Oliveira, A.M.M., 2019. Mimicking age-associated Gadd45 $\gamma$  dysregulation  
274 results in memory impairments in young adult mice. *The Journal of Neuroscience*, 1621-1619.  
275 Burger, C., 2010. Region-specific genetic alterations in the aging hippocampus: implications for cognitive aging. *Front Aging*  
276 *Neurosci* 2, 140.  
277 Corcoran, K.A., Lu, Y., Turner, R.S., Maren, S., 2002. Overexpression of hAPPswe impairs rewarded alternation and contextual fear  
278 conditioning in a transgenic mouse model of Alzheimer's disease. *Learning & memory (Cold Spring Harbor, N.Y.)* 9(5), 243-  
279 252.  
280 Foster, T.C., Defazio, R.A., Bizon, J.L., 2012. Characterizing cognitive aging of spatial and contextual memory in animal models.  
281 *Front Aging Neurosci* 4, 12.  
282 Gulmez Karaca, K., Brito, D.V.C., Zeuch, B., Oliveira, A.M.M., 2018. Adult hippocampal MeCP2 preserves the genomic  
283 responsiveness to learning required for long-term memory formation. *Neurobiology of learning and memory* 149, 84-97.  
284 Ianov, L., De Both, M., Chawla, M.K., Rani, A., Kennedy, A.J., Piras, I., Day, J.J., Siniard, A., Kumar, A., Sweatt, J.D., Barnes,  
285 C.A., Huentelman, M.J., Foster, T.C., 2017. Hippocampal Transcriptomic Profiles: Subfield Vulnerability to Age and  
286 Cognitive Impairment. *Front Aging Neurosci* 9, 383.

- 287 Impey, S., McCorkle, S.R., Cha-Molstad, H., Dwyer, J.M., Yochum, G.S., Boss, J.M., McWeeney, S., Dunn, J.J., Mandel, G.,  
288 Goodman, R.H., 2004. Defining the CREB regulon: a genome-wide analysis of transcription factor regulatory regions. *Cell*  
289 119(7), 1041-1054.
- 290 Kaufmann, L.T., Niehrs, C., 2011. Gadd45a and Gadd45g regulate neural development and exit from pluripotency in *Xenopus*.  
291 *Mechanisms of development* 128(7-10), 401-411.
- 292 Kennard, J.A., Woodruff-Pak, D.S., 2011. Age sensitivity of behavioral tests and brain substrates of normal aging in mice. *Front*  
293 *Aging Neurosci* 3, 9.
- 294 Leal, S.L., Yassa, M.A., 2015. Neurocognitive Aging and the Hippocampus across Species. *Trends in neurosciences* 38(12), 800-  
295 812.
- 296 Li, P., Rial, D., Canas, P.M., Yoo, J.H., Li, W., Zhou, X., Wang, Y., van Westen, G.J., Payen, M.P., Augusto, E., Goncalves, N.,  
297 Tome, A.R., Li, Z., Wu, Z., Hou, X., Zhou, Y., A, P.L., Boyden, E.S., Cunha, R.A., Qu, J., Chen, J.F., 2015. Optogenetic  
298 activation of intracellular adenosine A2A receptor signaling in the hippocampus is sufficient to trigger CREB phosphorylation  
299 and impair memory. *Molecular psychiatry* 20(11), 1481.
- 300 Li, X., Marshall, P.R., Leighton, L.J., Zajackowski, E.L., Wang, Z., Madugalle, S.U., Yin, J., Bredy, T.W., Wei, W., 2018. The  
301 DNA repair associated protein Gadd45 regulates the temporal coding of immediate early gene expression within the prefrontal  
302 cortex and is required for the consolidation of associative fear memory. *J Neurosci*.
- 303 Loerch, P.M., Lu, T., Dakin, K.A., Vann, J.M., Isaacs, A., Geula, C., Wang, J., Pan, Y., Gabuzda, D.H., Li, C., Prolla, T.A.,  
304 Yankner, B.A., 2008. Evolution of the aging brain transcriptome and synaptic regulation. *PLoS one* 3(10), e3329.
- 305 Muller, M., Cardenas, C., Mei, L., Cheung, K.H., Foscett, J.K., 2011. Constitutive cAMP response element binding protein (CREB)  
306 activation by Alzheimer's disease presenilin-driven inositol trisphosphate receptor (InsP3R) Ca<sup>2+</sup> signaling. *Proceedings of*  
307 *the National Academy of Sciences of the United States of America* 108(32), 13293-13298.
- 308 Oliveira, A.M., Hemstedt, T.J., Bading, H., 2012. Rescue of aging-associated decline in Dnmt3a2 expression restores cognitive  
309 abilities. *Nat Neurosci* 15(8), 1111-1113.
- 310 Oliveira, A.M., Hemstedt, T.J., Freitag, H.E., Bading, H., 2016. Dnmt3a2: a hub for enhancing cognitive functions. *Mol Psychiatry*  
311 21(8), 1130-1136.
- 312 Pittenger, C., Huang, Y.Y., Paletzki, R.F., Bourchouladze, R., Scanlin, H., Vronskaya, S., Kandel, E.R., 2002. Reversible inhibition  
313 of CREB/ATF transcription factors in region CA1 of the dorsal hippocampus disrupts hippocampus-dependent spatial  
314 memory. *Neuron* 34(3), 447-462.
- 315 Pliassova, A., Canas, P.M., Xavier, A.C., da Silva, B.S., Cunha, R.A., Agostinho, P., 2016. Age-Related Changes in the Synaptic  
316 Density of Amyloid-beta Protein Precursor and Secretases in the Human Cerebral Cortex. *J Alzheimers Dis* 52(4), 1209-1214.
- 317 Rao-Ruiz, P., Couey, J.J., Marcelo, I.M., Bouwkamp, C.G., Slump, D.E., Matos, M.R., van der Loo, R.J., Martins, G.J., van den  
318 Hout, M., van, I.W.F., Costa, R.M., van den Oever, M.C., Kushner, S.A., 2019. Engram-specific transcriptome profiling of  
319 contextual memory consolidation. *Nature communications* 10(1), 2232.
- 320 Schindelin, J., Arganda-Carreras, I., Frise, E., Kaynig, V., Longair, M., Pietzsch, T., Preibisch, S., Rueden, C., Saalfeld, S., Schmid,  
321 B., Tinevez, J.Y., White, D.J., Hartenstein, V., Eliceiri, K., Tomancak, P., Cardona, A., 2012. Fiji: an open-source platform for  
322 biological-image analysis. *Nature methods* 9(7), 676-682.
- 323 Singh-Manoux, A., Kivimaki, M., Glymour, M.M., Elbaz, A., Berr, C., Ebmeier, K.P., Ferrie, J.E., Dugravot, A., 2012. Timing of  
324 onset of cognitive decline: results from Whitehall II prospective cohort study. *BMJ* 344, d7622.
- 325 Stefanelli, G., Azam, A.B., Walters, B.J., Brimble, M.A., Gettens, C.P., Bouchard-Cannon, P., Cheng, H.M., Davidoff, A.M.,  
326 Narkaj, K., Day, J.J., Kennedy, A.J., Zovkic, I.B., 2018. Learning and Age-Related Changes in Genome-wide H2A.Z Binding  
327 in the Mouse Hippocampus. *Cell reports* 22(5), 1124-1131.
- 328 Temido-Ferreira, M., Ferreira, D.G., Batalha, V.L., Marques-Morgado, I., Coelho, J.E., Pereira, P., Gomes, R., Pinto, A., Carvalho,  
329 S., Canas, P.M., Cuvelier, L., Buee-Scherrer, V., Faivre, E., Baqi, Y., Muller, C.E., Pimentel, J., Schiffmann, S.N., Buee, L.,  
330 Bader, M., Outeiro, T.F., Blum, D., Cunha, R.A., Marie, H., Pousinha, P.A., Lopes, L.V., 2018. Age-related shift in LTD is  
331 dependent on neuronal adenosine A2A receptors interplay with mGluR5 and NMDA receptors. *Molecular psychiatry*.
- 332 Verbitsky, M., Yonan, A.L., Malleret, G., Kandel, E.R., Gilliam, T.C., Pavlidis, P., 2004. Altered hippocampal transcript profile  
333 accompanies an age-related spatial memory deficit in mice. *Learning & memory (Cold Spring Harbor, N.Y.)* 11(3), 253-260.
- 334 Viosca, J., Malleret, G., Bourchouladze, R., Benito, E., Vronskaya, S., Kandel, E.R., Barco, A., 2009. Chronic enhancement of  
335 CREB activity in the hippocampus interferes with the retrieval of spatial information. *Learning & memory (Cold Spring*  
336 *Harbor, N.Y.)* 16(3), 198-209.
- 337 Zahn, J.M., Poosala, S., Owen, A.B., Ingram, D.K., Lustig, A., Carter, A., Weeraratna, A.T., Taub, D.D., Gorospe, M., Mazan-  
338 Mameczar, K., Lakatta, E.G., Boheler, K.R., Xu, X., Mattson, M.P., Falco, G., Ko, M.S., Schlessinger, D., Firman, J.,  
339 Kummerfeld, S.K., Wood, W.H., 3rd, Zonderman, A.B., Kim, S.K., Becker, K.G., 2007. AGEMAP: a gene expression  
340 database for aging in mice. *PLoS Genet* 3(11), e201.
- 341 Zhang, S.J., Steijaert, M.N., Lau, D., Schutz, G., Delucinge-Vivier, C., Descombes, P., Bading, H., 2007. Decoding NMDA receptor  
342 signaling: identification of genomic programs specifying neuronal survival and death. *Neuron* 53(4), 549-562.
- 343

## 344 Figure legends

345 **Figure 1.** Human hippocampal Gadd45 $\gamma$  expression is increased during aging and  
346 overexpressing Gadd45 $\gamma$  in the mouse hippocampus impairs object location memory. **A)**  
347 Correlational analysis between the expression of Gadd45 $\alpha$ , Gadd45 $\beta$  and Gadd45 $\gamma$  in  
348 human *postmortem* hippocampal tissue and donors' age (N=6). Correlation analysis was

349 performed using Pearson correlation coefficient or Spearman correlation. **B)** Schematic  
350 representation of the viral constructs used. The viral vector contains a CamKII $\alpha$  promoter  
351 driving Gadd45 $\gamma$  overexpression (Gadd45 $\gamma$ OE) or GFP as a control (GFP). **C)** Schematic  
352 representation of the experimental design for behavioral tests. **D)** Representative exploration  
353 patterns of all groups during open field test. **E)** Locomotion analysis of the different groups  
354 measured as the total distance travelled during the open field test (N=8-9). **F)** Anxiety-like  
355 behavior analysis measured as percentage of time spent in the center of the arena during the  
356 open field test (N=8-9). **G)** 24h object location memory test of young adult mice expressing  
357 GFP or Gadd45 $\gamma$ OE in the dHPC (N=13-15). Dashed line represents equal preference for  
358 either object (chance preference). **H)** 24h contextual fear memory test of young adult mice  
359 expressing GFP or Gadd45 $\gamma$ OE in the dHPC (N=9). ns: not significant; \*\*p<0.01 by two-tailed  
360 unpaired Student's t-test. Error bars represent SEM.

361 **Figure 2.** Increased Gadd45 $\gamma$  expression in mouse hippocampal cultures dysregulates  
362 CREB phosphorylation and activity-dependent gene expression. **A)** Schematic  
363 representation of the experimental design for western blot analysis of CREB activation. **B)**  
364 Representative immunoblot scans using phosphospecific and total CREB antibodies in  
365 hippocampal cultures infected with rAAV expressing GFP or Gadd45 $\gamma$ -OE. **C)** Immunoblot  
366 quantification shown as ratios of phosphorylated/total protein normalized to uninfected  
367 control (N=7 independent cell preparations). **D)** Schematic representation of the  
368 experimental design for qRT-PCR analysis of the expression of CREB-dependent genes  
369 (N=5-6 independent cell preparations) **E)** *Arc*, **F)** *c-Fos* **G)** *FosB* **H)** *Egr1* and **I)** *Npas4* in  
370 hippocampal cultures. Hippocampal cultures were harvested at baseline conditions or after  
371 2h, 4h, or 6h of bicuculline treatment. <sup>##</sup>p<0.01 by two-tailed Mann-Whitney test. \*p<0.05,  
372 \*\*p<0.01 and \*\*\*p<0.001 by two-tailed Student's t-test. ns: not significant. Error bars  
373 represent SEM.

374

# Figure 1

## A

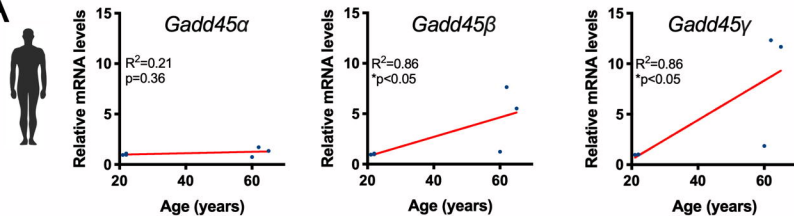

## B

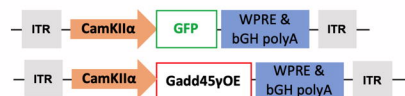

## C

Bilateral rAAV injections into the dHPC of young adult mice

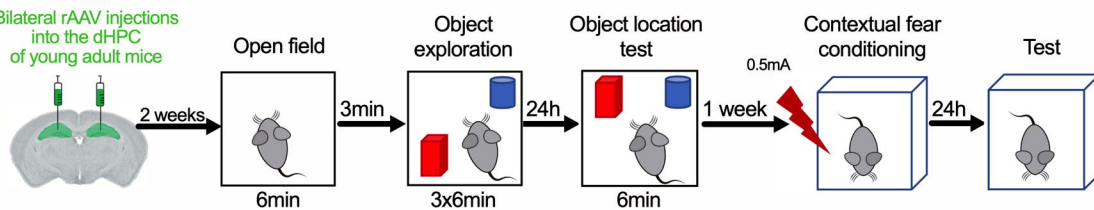

## D

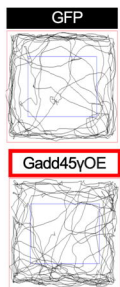

## E

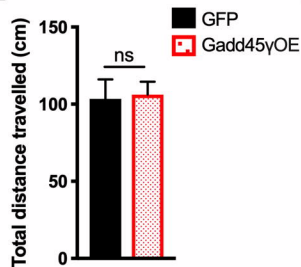

## F

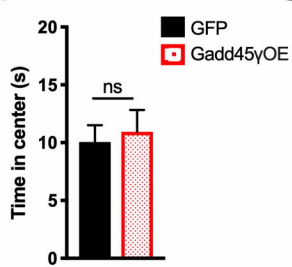

## G

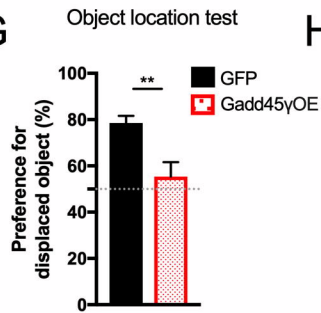

## H

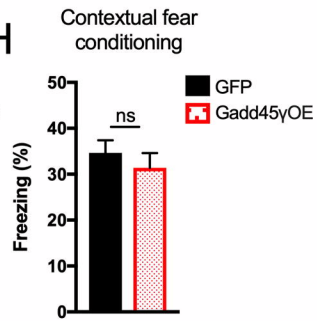

**Figure 2**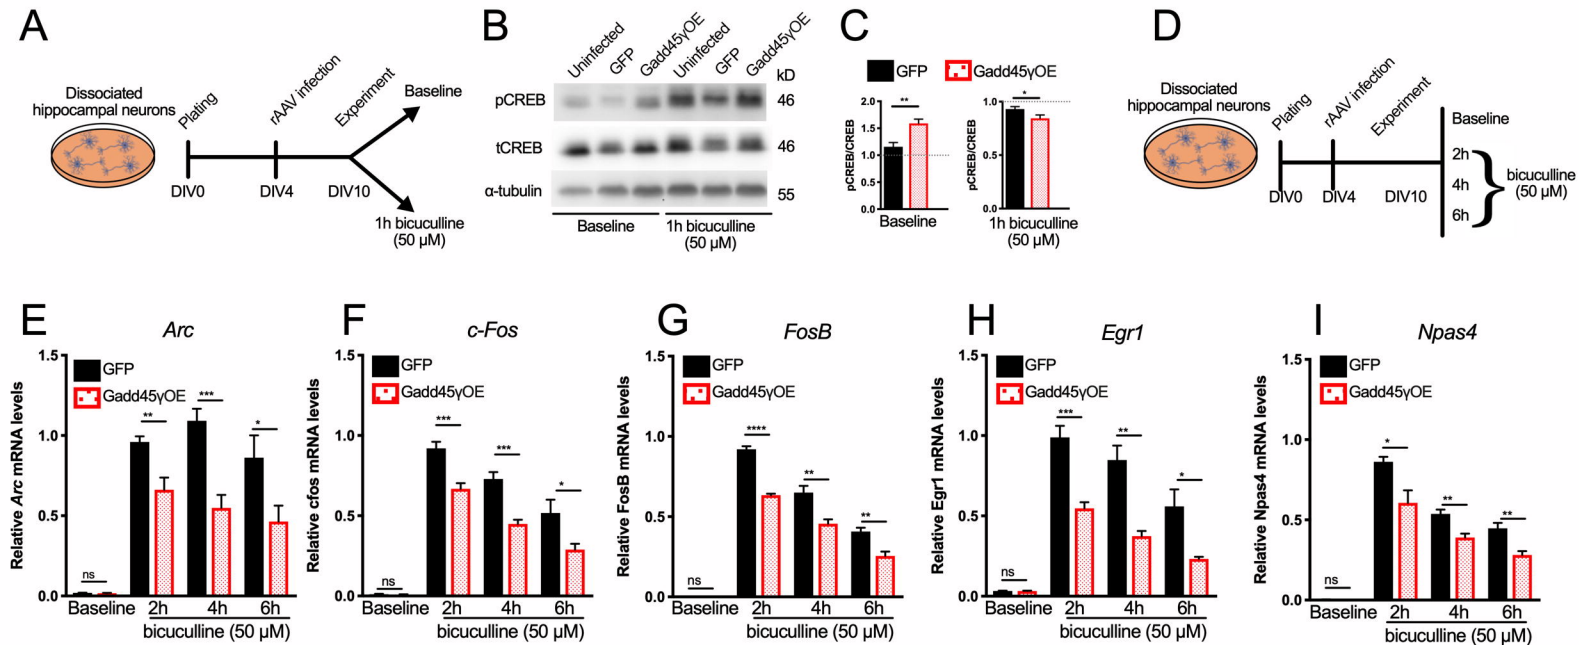

Source: https://www.biorxiv.org/content/10.1101/2020.01.12.903112v1.full.pdf
