1 **Modeling human age-associated increase in Gadd45y expression leads to spatial**  
2 **recognition memory impairments in young adult mice**

3 David V.C. Brito<sup>1</sup>, Kubra Gulmez Karaca<sup>1,3</sup>, Janina Kupke<sup>1</sup>, Franziska Mudlaff<sup>1</sup>, Benjamin  
4 Zeuch<sup>1,4</sup>, Rui Gomes<sup>2</sup>, Luísa V. Lopes<sup>2</sup>, Ana M.M. Oliveira<sup>1\*</sup>

5

6 <sup>1</sup> Department of Neurobiology, Interdisciplinary Centre for Neurosciences (IZN), Heidelberg  
7 University, INF 366, 69120 Heidelberg, Germany

8 <sup>2</sup> Instituto de Medicina Molecular João Lobo Antunes, Faculdade de Medicina de Lisboa,  
9 Universidade de Lisboa, 1649-028 Lisbon, Portugal

10 <sup>3</sup> Present address: Department of Cognitive Neuroscience, Donders Institute for Brain,  
11 Cognition and Behaviour, Radboud University Medical Center Kapittelweg 29, 6525 EN  
12 Nijmegen, The Netherlands

13 <sup>4</sup> Present address: Directors' Research, European Molecular Biology Laboratory (EMBL),  
14 Meyerhofstrasse 1, 69117 Heidelberg, Germany

15

16 \* Corresponding author:

17 Ana MM Oliveira

18 Department of Neurobiology, Interdisciplinary Center for Neurosciences (IZN)

19 Heidelberg University

20 Im Neuenheimer Feld 366

21 69120 Heidelberg, Germany

22 Telephone: +49 6221 54 16510

23 Fax: +49 6221 54 16524

24 E-mail: oliveira@nbio.uni-heidelberg.de

25

26 **Abstract**

27 Aging is associated with the progressive decay of cognitive function. Hippocampus-  
28 dependent processes, such as the formation of spatial memory, are particularly vulnerable to  
29 aging. Currently, the molecular mechanisms responsible for age-dependent cognitive decline  
30 are largely unknown. Here, we investigated the expression and function of the growth arrest  
31 DNA damage gamma (Gadd45 $\gamma$ ) during aging and cognition. We report that Gadd45 $\gamma$   
32 expression is increased in the hippocampus of aged humans and that Gadd45 $\gamma$   
33 overexpression in the young adult mouse hippocampus compromises cognition. Moreover,  
34 Gadd45 $\gamma$  overexpression in hippocampal neurons disrupted CREB signaling and the  
35 expression of well-established activity-regulated genes. This work shows that Gadd45 $\gamma$   
36 expression is tightly controlled in the hippocampus and its disruption may be a mechanism  
37 contributing to age-related cognitive impairments observed in humans.

38

39 **Keywords:** Activity-regulated gene expression, age-related cognitive deficits, CREB,  
40 Gadd45 $\gamma$ , object location memory.

41

42

43

44

45

46

47

48

49

50

51        **1. Introduction**

52    Age-related cognitive decline in humans affects about 40% of individuals aged 65 years or  
53    older (Aigbogun et al., 2017), even though deterioration of cognitive functions may start  
54    earlier (Singh-Manoux et al., 2012). Long-term memory formation requires activity-regulated  
55    signaling that results in *de novo* gene expression. These genomic responses are known to  
56    be disrupted in the aged hippocampus (Stefanelli et al., 2018). Therefore, age-associated  
57    changes that dysregulate the coupling between neuronal activity and gene transcription likely  
58    underlie age-related cognitive deficits.

59    Recently, we and others showed that the growth arrest DNA damage gamma (*Gadd45y*) is  
60    required for memory formation in the prelimbic prefrontal cortex (Li et al., 2018) and the  
61    hippocampus (Brito et al., 2020). Moreover, we found that aging reduces *Gadd45y*  
62    expression in the mouse hippocampus and that mimicking this reduction in young adult mice  
63    induces age-like memory impairments (Brito et al., 2020). At the molecular level, *Gadd45y* is  
64    required for cAMP response element-binding protein (CREB) activation in response to  
65    neuronal activity and associated gene expression (Brito et al., 2020). In the current study, we  
66    found that in *postmortem* human hippocampal tissue from aged individuals, *Gadd45y*  
67    expression levels are increased relative to young donors. Furthermore, we showed that  
68    increasing *Gadd45y* levels in the mouse hippocampus led to impairments in memory  
69    formation and disrupted CREB activation and memory-related gene expression in cultured  
70    hippocampal neurons.

71    Overall, this work together with our previous findings (Brito et al., 2020), demonstrate a  
72    requirement for tight regulation of neuronal *Gadd45y* levels in gene expression regulation  
73    and cognitive abilities. Thus, dysregulation of *Gadd45y* expression might be an underlying  
74    mechanism involved in age-related cognitive impairments observed in mice and humans.

75

76        **2. Materials and Methods**

77       **2.1. Subjects.** The use of human samples was conducted in accordance with the  
78 Helsinki Declaration as well as national ethical guidelines. Protocols were approved by the  
79 Local Ethics Committee and the National Data Protection Committee. The biospecimens  
80 were obtained 36h *postmortem* from healthy aged (60–65 years old) and young (21–22 years  
81 old) individuals (Temido-Ferreira et al., 2018). The tissue was processed and preserved for  
82 molecular analyses as previously described (Pliassova et al., 2016). Young adult male  
83 C57BL/6N mice (Charles River, Sulzfeld, Germany) were 3-months-old at the time of  
84 behavior experiments. Mice were group-housed (3-4 mice per cage) on a 12h light/dark cycle  
85 ( $22 \pm 1^\circ\text{C}$ ,  $55 \pm 10\%$  relative humidity) with *ad libitum* access to water and food. All  
86 behavioral experiments took place during the light phase. All procedures were carried out in  
87 accordance with German guidelines for the care and use of laboratory animals and with the  
88 European Community Council Directive 86/609/EEC.

89       **2.2. Recombinant adeno-associated virus (rAAVs).** Viral particles were  
90 produced and purified as described previously (Gulmez Karaca et al., 2020). Overexpression  
91 of Gadd45y was achieved by using a viral vector that contained the mouse CamKII $\alpha$   
92 promoter upstream of the Gadd45y full-length mouse cDNA sequence. As a control vector,  
93 we used a construct containing the CamKII $\alpha$  promoter driving the expression of GFP. For  
94 each virus batch, toxicity was analyzed on primary hippocampal cultures before the start of  
95 the experiments. For this, different regions of the coverslip were imaged using identical  
96 microscope settings and the number of dead cells was quantified using Fiji (Schindelin et al.,  
97 2012) on day *in vitro* (DIV) 10.

98       **2.3. Primary hippocampal cultures.** Hippocampal cultures from newborn  
99 C57Bl/6N mice (Charles River, Sulzfeld, Germany) were prepared and maintained as  
100 previously described (Gulmez Karaca et al., 2020). rAAV infection of cultures occurred on  
101 DIV 4. Experiments were performed on DIV 10. To induce action potential bursting, cultures  
102 were treated with 50  $\mu\text{M}$  bicuculline (Enzo Life Sciences, Germany).

103       **2.4. Stereotaxic surgery.** rAAVs were injected into the dorsal hippocampus at the  
104 following coordinates relative to Bregma: – 2 mm anteroposterior,  $\pm 1.5$  mm medio-lateral, –

105 1.7, – 1.9 and – 2.1 mm dorsoventral. A total volume of 1.5 µl was injected per hemisphere  
106 at 200 nl/min. Following injections at each individual site, the needle was left in place for 60s.  
107 Behavioral experiments started 2 weeks after rAAVs delivery. After behavioral testing,  
108 histological analysis was performed to confirm tissue and cellular integrity.

109 **2.5. Behavioral testing.** Before behavioral testing started, mice were habituated  
110 to the experimenter and behavioral room by handling for 3 consecutive days, 1 minute per  
111 mouse. Object-location test and contextual fear conditioning were performed as previously  
112 described (Oliveira et al., 2012; Oliveira et al., 2016). The open field test was carried out  
113 within the first session of the object-place recognition training as previously described  
114 (Gulmez Karaca et al., 2018).

115 **2.6. Quantitative reverse-transcription PCR.** Total RNA from human tissue was  
116 extracted and cDNA produced as previously described (Temido-Ferreira et al., 2018). For  
117 RNA isolation from mouse hippocampal tissue, the tissue was rapidly dissected, placed in  
118 RNAlater (Sigma, Munich, Germany) and isolated using the RNeasy Plus Mini Kit (Qiagen,  
119 Hilden, Germany) with additional on-column DNase I digestion, according to the  
120 manufacturer's instructions. cDNA production and quantitative reverse-transcription PCR (q-  
121 RT-PCR) was performed as previously described (Brito et al., 2020). The following TaqMan  
122 probes were used: *Arc* (Mm00479619\_g1), *c-Fos* (Mm00487425\_m1), *FosB*  
123 (Mm00500401\_m1), *Gadd45α* (Mm00432802\_m1), *Gadd45β* (Mm00345123\_m1), *Gadd45γ*  
124 (Mm00442225\_m1), *Egr1* (Mm00656724\_m1) and *Npas4* (Mm00463644\_m1). For human  
125 genes the following TaqMan probes were used: *Gadd45α* (Hs00169255\_m1), *Gadd45β*  
126 (Hs00169587\_m1), *Gadd45γ* (Hs00198672\_m1). Expression levels of target genes were  
127 normalized to the expression of the housekeeping gene *GusB* (Mm00446953\_m1) or  $\beta$ -actin  
128 (Hs01060665\_g1) for mouse or human genes, respectively. Controls were used to exclude  
129 the possibility of DNA or RNA contaminations.

130 **2.7. Western blotting.** Western blotting was performed as previously described  
131 with minor modifications (Brito et al., 2020; Gulmez Karaca et al., 2020). Briefly, hippocampal  
132 cultures infected on DIV 4 were lysed on DIV 10 in SDS sample buffer. In the case of

133 western blotting of tissue samples, the dorsal hippocampus was microdissected from mouse  
134 brain and homogenized in RIPA buffer (150 mM NaCl, 1% Triton X-100, 0.5% sodium  
135 deoxycholate, 0.1% SDS, 50 mM Tris, pH 8.0) supplemented with 1% protease inhibitor  
136 cocktail (Sigma-Aldrich, Munich, Germany) and 1% phosphatase inhibitor cocktail II and III  
137 (Sigma-Aldrich, P5726, P0044), the whole procedure was performed at 4°C. Protein  
138 concentration was measured by Bradford assay and 20 µg of protein was loaded on a 10%  
139 polyacrylamide gel after being denatured at 95 °C for 5 min. After SDS-PAGE, gels were  
140 blotted onto a nitrocellulose membrane (GE Healthcare, Buckinghamshire, UK) and later  
141 blocked in 5% milk and probed with the following antibodies: phospho-CREB (1:6000,  
142 Millipore #05-667), total-CREB (1:5000, Cell Signaling, #4820), β-Actin (1:1000, Santa Cruz,  
143 #SC-47778) or α-Tubulin (1:40000, Sigma-Aldrich, #T9026). Antibodies were diluted in 5%  
144 milk in PBS-T (total-CREB, α-Tubulin and β-Actin) or in 5% bovine serum albumin in PBS-T  
145 (phospho-CREB). Next, the membranes were incubated with horseradish peroxidase-  
146 conjugated secondary antibodies and later analyzed using a ChemiDoc™ Imaging System  
147 (Bio-Rad). Data is presented as ratio of phosphorylated/total protein normalized internally to  
148 each uninfected condition.

149 **2.8. Statistical information.** For normally distributed data sets, two-tailed  
150 unpaired Student's t test or one-way ANOVA were used to compare two or more groups  
151 respectively (significant data is marked with \*). Two-tailed Mann-Whitney test was used to  
152 compare two distinct groups for non-Gaussian distribution (significant data is marked with #).  
153 Correlation analysis was performed using Pearson correlation coefficient or Spearman  
154 correlation for normally distributed or non-parametric data, respectively. The sample size was  
155 determined based on similar experiments carried out in the past. All plotted data represent  
156 mean ± SEM. Statistics were performed using GraphPad Prism for Mac OS X, version 8. For  
157 behavioral experiments the investigators were blind to group allocation during data collection  
158 and analysis. For *in vitro* experiments no blinding was performed since the outcome was  
159 dependent on software analysis and not manual scoring.

160

161 **3. Results**

162 **3.1. Aging increases Gadd45 $\gamma$  expression in the human hippocampus.**

163 Aberrant gene expression patterns are an evolutionarily conserved hallmark of aging.  
164 However, no overall correlation between age-associated gene expression in mice and  
165 humans has been detected (Zahn et al., 2007). We asked whether Gadd45 $\gamma$  expression in  
166 human aged hippocampus would be compromised as observed in mice (Brito et al., 2020).  
167 We analyzed the expression of Gadd45 family members in young and aged human  
168 hippocampi as we previously described (21–65 years old) (Temido-Ferreira et al., 2018)  
169 (Figure 1A). We did not find any correlation between age and *Gadd45 $\alpha$*  expression.  
170 Interestingly, we found that hippocampal *Gadd45 $\beta$*  and *Gadd45 $\gamma$*  levels were increased (~4.8  
171 and ~8.6 fold, respectively) as age progressed. This result, together with our previous  
172 findings in aged mouse tissue (Brito et al., 2020), suggests that age-related Gadd45  
173 expression changes in the hippocampus may not be conserved in mice and humans.

174 **3.2. Gadd45 $\gamma$  overexpression leads to impairments in spatial recognition**

175 **memory.** Next, we sought to model the human aging-associated Gadd45 $\gamma$  increase in the  
176 mouse hippocampus and determine the cellular and behavioral consequences of neuronal  
177 Gadd45 $\gamma$  overexpression. Given that previous studies showed a selective function for  
178 Gadd45 $\gamma$  in memory formation (Brito et al., 2020; Li et al., 2018), we focused on Gadd45 $\gamma$ .  
179 We stereotaxically delivered a viral vector containing the mouse CamKII $\alpha$  promoter driving  
180 the expression of Gadd45 $\gamma$ , or GFP as a control, into the dorsal hippocampus (dHPC) of  
181 young adult mice (Figure 1B,C). We validated viral expression in the dHPC of injected  
182 animals by assessing GFP expression and *Gadd45 $\gamma$*  mRNA levels (Figure S1A-C). Neither  
183 group showed anatomical or histological brain abnormalities. Two weeks after stereotaxic  
184 surgery, before assessing cognitive function, we performed an open field test (Figure 1C) to  
185 verify whether Gadd45 $\gamma$  overexpression affects locomotor activity or anxiety-like behavior.  
186 Total distance travelled and the percentage of the time spent in the central zone were similar  
187 between groups (Figure 1D-F). Next, we assessed long-term memory in the object-place  
188 recognition test and contextual fear conditioning. Increasing Gadd45 $\gamma$  expression in the

189 dHPC of young mice impaired preference for the displaced object 24h after learning (Figure  
190 1G). This impairment was not due to altered habituation patterns during the training trial  
191 sessions or altered object exploratory behavior (Figure S1D,E). In contrast, Gadd45yOE  
192 mice showed intact long-term memory in contextual fear conditioning (Figure 1H). Both  
193 groups presented similar responses to shock administration (Figure S1F).

### 194 **3.3. Gadd45y overexpression disrupts activity-dependent CREB activation**

195 **and gene expression.** Considering that Gadd45y regulates CREB activity (Brito et al.,  
196 2020), we next investigated whether Gadd45y overexpression would impact CREB  
197 regulation. First, we assessed whether Gadd45y overexpression in the hippocampus of  
198 young adult mice (Figure 2A) affects the levels of phosphorylated CREB in baseline  
199 conditions. In agreement with a role for Gadd45y in signaling pathways that regulate CREB  
200 activation (Brito et al., 2020), overexpression of Gadd45y resulted in increased levels of  
201 phosphorylated CREB (Figure 2B,C). Next using primary hippocampal cultures (Figure  
202 S1G,H) we analyzed the phosphorylation of CREB in baseline conditions and in response to  
203 increased neuronal activity (Figure 2D). Similar to our *in vivo* findings (Figure 2A-C),  
204 Gadd45y overexpression in primary hippocampal cultures led to increased levels of  
205 phosphorylated CREB in basal conditions. Moreover, this effect appeared to blunt a  
206 response to neuronal activity; CREB phosphorylation in response to neuronal activity did not  
207 reach controls levels (Figure 2E,F). We next assessed the expression of the CREB-  
208 dependent genes *Arc*, *FosB*, *c-Fos*, *Egr1* and *Npas4* (Impey et al., 2004; Rao-Ruiz et al.,  
209 2019) in basal conditions and upon neuronal activity (Figure 2G). Hippocampal neuronal  
210 cultures infected with rAAV-Gadd45yOE revealed disrupted CREB-dependent gene  
211 expression in response to increased neuronal activity compared to control conditions (Figure  
212 2H-L). This set of experiments shows that increasing Gadd45y above physiological levels in  
213 hippocampal neurons disrupts CREB phosphorylation and gene expression required for  
214 memory formation. Taken together, these findings demonstrate that an increase in  
215 hippocampal Gadd45y levels disrupts CREB regulation, the expression of memory-related  
216 genes and cognitive function.



217

#### 218 **4. Discussion**

219 This study suggested that human aging is associated with increased hippocampal Gadd45y  
220 expression. Together with our previous findings (Brito et al., 2020) we showed that  
221 bidirectional dysregulation of hippocampal Gadd45y levels in young adult mice negatively  
222 impacts cognitive function, CREB regulation and the expression of memory-related genes.  
223 Thus, implicating a requirement for tight control of Gadd45y levels in brain function.

224 We observed that mimicking the human aging-related increase in Gadd45y expression in the  
225 mouse hippocampus or in dissociated hippocampal neurons, promoted memory deficits and  
226 impairments in CREB-dependent gene transcription, respectively. Both the reduction or  
227 chronic enhancement of CREB function is known to lead to spatial memory deficits (Li et al.,  
228 2015; Pittenger et al., 2002; Viosca et al., 2009), as described in studies using CREB-  
229 deficient mutants (Pittenger et al., 2002) or mouse models that express constitutively active  
230 forms of CREB such as VP16-CREB (Viosca et al., 2009). Moreover, constitutive CREB  
231 activation has been identified as a possible contributing mechanism involved in Alzheimer's  
232 disease (Muller et al., 2011). In our study Gadd45y overexpression induced increased levels  
233 of phosphorylated CREB in basal conditions both in the mouse hippocampus and in  
234 hippocampal cultures. Although this remains to be investigated, the observed increase in  
235 Gadd45y expression levels in the aged human hippocampus, may also result in chronic  
236 elevations in the activated form of CREB. Our experiments in hippocampal cultures indicate  
237 that increased levels of phosphorylated CREB already in basal conditions impair a response  
238 to neuronal activity and result in deficits in the expression of plasticity-related genes. Thus,  
239 providing a possible mechanism for impaired cognitive function in conditions of elevated  
240 Gadd45y expression like in our model and possibly in the hippocampus of aged individuals.  
241 Together with our previous findings, which showed that Gadd45y knockdown leads to  
242 impairments in CREB activation and associated gene expression (Brito et al., 2020), this  
243 data suggests that proper cellular function requires the tight regulation of Gadd45y levels.

244 These findings are in agreement with another study showing that either Gadd45y loss- or  
245 gain-of-function disrupts neural development (Kaufmann and Niehrs, 2011).

246 The deficits in memory were task-specific; young adult mice expressing Gadd45y above  
247 physiological levels presented selective long-term memory impairments in object place-  
248 recognition memory but not in contextual fear conditioning. Intriguingly, similar results have  
249 been found in aged mice and humans. It has been described that aged mice (Kennard and  
250 Woodruff-Pak, 2011) and humans (Battaglia et al., 2018; Foster et al., 2012; Leal and Yassa,  
251 2015) are more likely to display deficits in forms of recognition memory than in contextual  
252 fear conditioning. The reasons for the selective impairment may be attributed to the  
253 characteristics of the tasks; despite hippocampal dysfunction in response to aging or  
254 Gadd45y overexpression, mice may still be able to form and store the association between a  
255 highly salient stimulus (novel context) and a foot-shock. Similar findings have been described  
256 for other models of impaired hippocampal function. Namely, in a mouse model of Rett  
257 syndrome (Gulmez Karaca et al., 2018) and Alzheimer's disease (Corcoran et al., 2002). In  
258 the later, contextual fear conditioning impairments were only present when the salience of  
259 the context was reduced.

260 Aberrant gene transcription patterns occur as a consequence of aging in the hippocampus  
261 (Burger, 2010; Janov et al., 2017; Verbitsky et al., 2004). These changes do not overly  
262 correlate across species (Bishop et al., 2010; Loerch et al., 2008; Zahn et al., 2007), thus  
263 limiting the translational potential of animal models. Studies comparing cross-species  
264 alterations in gene expression generally focus on shared changes. The similar  
265 consequences of bidirectional dysregulation of Gadd45y expression levels suggest that this  
266 approach may neglect functionally relevant and seemingly disparate age-associated  
267 transcription changes. Using *in vivo* and *in vitro* models we show that hippocampal levels of  
268 Gadd45y are tightly regulated and that either a decrease (Brito et al., 2020) or an increase in  
269 Gadd45y can dysregulate plasticity-associated gene expression and cause cognitive  
270 impairments. Notably, previous studies that performed transcriptomic analysis of human  
271 hippocampal tissue throughout adulthood also suggested an age-associated increase in

272 Gadd45 $\gamma$  expression (Kang et al., 2011; Pletikos et al., 2014). Accordingly, our findings  
273 illustrate a scenario in which diverging age-related transcriptional programs in mice and  
274 humans result in converging phenotypes.  
275 Taken together, our results demonstrate the requirement for tight control of Gadd45 $\gamma$  levels  
276 in memory formation and further implicate Gadd45 $\gamma$  as a molecular candidate that may  
277 underlie cognitive impairments in aging-associated pathological conditions.

278

## 279 **Acknowledgements**

280 We thank I. Bünzli-Ehret for the preparation of primary hippocampal cultures and Stephanie  
281 Zeuch for comments to the manuscript. This work was supported by the Deutsche  
282 Forschungsgemeinschaft (DFG) [SFB 1134 (C01), OL 437/1 to A.M.M.O.], by Chica and  
283 Heinz Schaller foundation [fellowship to A.M.M.O.] and by Santa Casa da Misericórdia  
284 Mantero Belard Award [MB-07-2018 to L.V.L.].

285

## 286 **Disclosure statement**

287 The authors declare no conflict of interest.

288

## 289 **References**

- 290 Aigbogun, M.S., Stellhorn, R., Krasa, H., Kostic, D., 2017. Severity of memory impairment in the elderly:  
291 Association with health care resource use and functional limitations in the United States. *Alzheimer's &*  
292 *dementia* (Amsterdam, Netherlands) 8, 51-59.  
293 Battaglia, S., Garofalo, S., di Pellegrino, G., 2018. Context-dependent extinction of threat memories: influences  
294 of healthy aging. *Scientific reports* 8(1), 12592.  
295 Bishop, N.A., Lu, T., Yankner, B.A., 2010. Neural mechanisms of ageing and cognitive decline. *Nature*  
296 464(7288), 529-535.  
297 Brito, D.V.C., Kupke, J., Gulmez Karaca, K., Zeuch, B., Oliveira, A.M.M., 2020. Mimicking age-associated  
298 Gadd45 $\gamma$  dysregulation results in memory impairments in young adult mice. *The Journal of*  
299 *Neuroscience*, 1621-1619.  
300 Burger, C., 2010. Region-specific genetic alterations in the aging hippocampus: implications for cognitive aging.  
301 *Front Aging Neurosci* 2, 140.  
302 Corcoran, K.A., Lu, Y., Turner, R.S., Maren, S., 2002. Overexpression of hAPP<sup>swe</sup> impairs rewarded  
303 alternation and contextual fear conditioning in a transgenic mouse model of Alzheimer's disease.  
304 *Learning & memory* (Cold Spring Harbor, N.Y.) 9(5), 243-252.  
305 Foster, T.C., Defazio, R.A., Bizon, J.L., 2012. Characterizing cognitive aging of spatial and contextual memory  
306 in animal models. *Front Aging Neurosci* 4, 12.  
307 Gulmez Karaca, K., Brito, D.V.C., Zeuch, B., Oliveira, A.M.M., 2018. Adult hippocampal MeCP2 preserves the  
308 genomic responsiveness to learning required for long-term memory formation. *Neurobiology of learning*  
309 *and memory* 149, 84-97.

- 310 Gulmez Karaca, K., Kupke, J., Brito, D.V.C., Zeuch, B., Thome, C., Weichenhan, D., Lutsik, P., Plass, C.,  
311 Oliveira, A.M.M., 2020. Neuronal ensemble-specific DNA methylation strengthens engram stability.  
312 *Nature communications* 11(1), 639.
- 313 Ianov, L., De Both, M., Chawla, M.K., Rani, A., Kennedy, A.J., Piras, I., Day, J.J., Siniard, A., Kumar, A.,  
314 Sweatt, J.D., Barnes, C.A., Huentelman, M.J., Foster, T.C., 2017. Hippocampal Transcriptomic Profiles:  
315 Subfield Vulnerability to Age and Cognitive Impairment. *Front Aging Neurosci* 9, 383.
- 316 Impey, S., McCorkle, S.R., Cha-Molstad, H., Dwyer, J.M., Yochum, G.S., Boss, J.M., McWeeney, S., Dunn,  
317 J.J., Mandel, G., Goodman, R.H., 2004. Defining the CREB regulon: a genome-wide analysis of  
318 transcription factor regulatory regions. *Cell* 119(7), 1041-1054.
- 319 Kang, H.J., Kawasawa, Y.I., Cheng, F., Zhu, Y., Xu, X., Li, M., Sousa, A.M., Pletikos, M., Meyer, K.A.,  
320 Sedmak, G., Guennel, T., Shin, Y., Johnson, M.B., Krsnik, Z., Mayer, S., Fertuzinhos, S., Umlauf, S.,  
321 Lisgo, S.N., Vortmeyer, A., Weinberger, D.R., Mane, S., Hyde, T.M., Huttner, A., Reimers, M.,  
322 Kleinman, J.E., Sestan, N., 2011. Spatio-temporal transcriptome of the human brain. *Nature* 478(7370),  
323 483-489.
- 324 Kaufmann, L.T., Niehrs, C., 2011. Gadd45a and Gadd45g regulate neural development and exit from  
325 pluripotency in *Xenopus*. *Mechanisms of development* 128(7-10), 401-411.
- 326 Kennard, J.A., Woodruff-Pak, D.S., 2011. Age sensitivity of behavioral tests and brain substrates of normal  
327 aging in mice. *Front Aging Neurosci* 3, 9.
- 328 Leal, S.L., Yassa, M.A., 2015. Neurocognitive Aging and the Hippocampus across Species. *Trends in*  
329 *neurosciences* 38(12), 800-812.
- 330 Li, P., Rial, D., Canas, P.M., Yoo, J.H., Li, W., Zhou, X., Wang, Y., van Westen, G.J., Payen, M.P., Augusto, E.,  
331 Goncalves, N., Tome, A.R., Li, Z., Wu, Z., Hou, X., Zhou, Y., A, P.I., Boyden, E.S., Cunha, R.A., Qu, J.,  
332 Chen, J.F., 2015. Optogenetic activation of intracellular adenosine A2A receptor signaling in the  
333 hippocampus is sufficient to trigger CREB phosphorylation and impair memory. *Molecular psychiatry*  
334 20(11), 1481.
- 335 Li, X., Marshall, P.R., Leighton, L.J., Zajackowski, E.L., Wang, Z., Madugalle, S.U., Yin, J., Bredy, T.W.,  
336 Wei, W., 2018. The DNA repair associated protein Gadd45 regulates the temporal coding of immediate  
337 early gene expression within the prelimbic prefrontal cortex and is required for the consolidation of  
338 associative fear memory. *J Neurosci*.
- 339 Loerch, P.M., Lu, T., Dakin, K.A., Vann, J.M., Isaacs, A., Geula, C., Wang, J., Pan, Y., Gabuzda, D.H., Li, C.,  
340 Prolla, T.A., Yankner, B.A., 2008. Evolution of the aging brain transcriptome and synaptic regulation.  
341 *PloS one* 3(10), e3329.
- 342 Muller, M., Cardenas, C., Mei, L., Cheung, K.H., Foscett, J.K., 2011. Constitutive cAMP response element  
343 binding protein (CREB) activation by Alzheimer's disease presenilin-driven inositol trisphosphate  
344 receptor (InsP3R) Ca<sup>2+</sup> signaling. *Proceedings of the National Academy of Sciences of the United States*  
345 *of America* 108(32), 13293-13298.
- 346 Oliveira, A.M., Hemstedt, T.J., Bading, H., 2012. Rescue of aging-associated decline in Dnmt3a2 expression  
347 restores cognitive abilities. *Nat Neurosci* 15(8), 1111-1113.
- 348 Oliveira, A.M., Hemstedt, T.J., Freitag, H.E., Bading, H., 2016. Dnmt3a2: a hub for enhancing cognitive  
349 functions. *Mol Psychiatry* 21(8), 1130-1136.
- 350 Pittenger, C., Huang, Y.Y., Paletzki, R.F., Bourchouladze, R., Scanlin, H., Vronskaya, S., Kandel, E.R., 2002.  
351 Reversible inhibition of CREB/ATF transcription factors in region CA1 of the dorsal hippocampus  
352 disrupts hippocampus-dependent spatial memory. *Neuron* 34(3), 447-462.
- 353 Pletikos, M., Sousa, A.M., Sedmak, G., Meyer, K.A., Zhu, Y., Cheng, F., Li, M., Kawasawa, Y.I., Sestan, N.,  
354 2014. Temporal specification and bilaterality of human neocortical topographic gene expression. *Neuron*  
355 81(2), 321-332.
- 356 Pliassova, A., Canas, P.M., Xavier, A.C., da Silva, B.S., Cunha, R.A., Agostinho, P., 2016. Age-Related  
357 Changes in the Synaptic Density of Amyloid-beta Protein Precursor and Secretases in the Human  
358 Cerebral Cortex. *J Alzheimers Dis* 52(4), 1209-1214.
- 359 Rao-Ruiz, P., Couey, J.J., Marcelo, I.M., Bouwkamp, C.G., Slump, D.E., Matos, M.R., van der Loo, R.J.,  
360 Martins, G.J., van den Hout, M., van, I.W.F., Costa, R.M., van den Oever, M.C., Kushner, S.A., 2019.  
361 Engram-specific transcriptome profiling of contextual memory consolidation. *Nature communications*  
362 10(1), 2232.
- 363 Schindelin, J., Arganda-Carreras, I., Frise, E., Kaynig, V., Longair, M., Pietzsch, T., Preibisch, S., Rueden, C.,  
364 Saalfeld, S., Schmid, B., Tinevez, J.Y., White, D.J., Hartenstein, V., Eliceiri, K., Tomancak, P., Cardona,  
365 A., 2012. Fiji: an open-source platform for biological-image analysis. *Nature methods* 9(7), 676-682.
- 366 Singh-Manoux, A., Kivimaki, M., Glymour, M.M., Elbaz, A., Berr, C., Ebmeier, K.P., Ferrie, J.E., Dugravot, A.,  
367 2012. Timing of onset of cognitive decline: results from Whitehall II prospective cohort study. *BMJ* 344,  
368 d7622.
- 369 Stefanelli, G., Azam, A.B., Walters, B.J., Brimble, M.A., Gettens, C.P., Bouchard-Cannon, P., Cheng, H.M.,  
370 Davidoff, A.M., Narkaj, K., Day, J.J., Kennedy, A.J., Zovkic, I.B., 2018. Learning and Age-Related  
371 Changes in Genome-wide H2A.Z Binding in the Mouse Hippocampus. *Cell reports* 22(5), 1124-1131.

372 Temido-Ferreira, M., Ferreira, D.G., Batalha, V.L., Marques-Morgado, I., Coelho, J.E., Pereira, P., Gomes, R.,  
373 Pinto, A., Carvalho, S., Canas, P.M., Cuvelier, L., Buee-Scherrer, V., Faivre, E., Baqi, Y., Muller, C.E.,  
374 Pimentel, J., Schiffmann, S.N., Buee, L., Bader, M., Outeiro, T.F., Blum, D., Cunha, R.A., Marie, H.,  
375 Pousinha, P.A., Lopes, L.V., 2018. Age-related shift in LTD is dependent on neuronal adenosine A2A  
376 receptors interplay with mGluR5 and NMDA receptors. *Molecular psychiatry*.  
377 Verbitsky, M., Yonan, A.L., Malleret, G., Kandel, E.R., Gilliam, T.C., Pavlidis, P., 2004. Altered hippocampal  
378 transcript profile accompanies an age-related spatial memory deficit in mice. *Learning & memory* (Cold  
379 Spring Harbor, N.Y.) 11(3), 253-260.  
380 Viosca, J., Malleret, G., Bourchouladze, R., Benito, E., Vronskava, S., Kandel, E.R., Barco, A., 2009. Chronic  
381 enhancement of CREB activity in the hippocampus interferes with the retrieval of spatial information.  
382 *Learning & memory* (Cold Spring Harbor, N.Y.) 16(3), 198-209.  
383 Zahn, J.M., Poosala, S., Owen, A.B., Ingram, D.K., Lustig, A., Carter, A., Weeraratna, A.T., Taub, D.D.,  
384 Gorospe, M., Mazan-Mamczarz, K., Lakatta, E.G., Boheler, K.R., Xu, X., Mattson, M.P., Falco, G., Ko,  
385 M.S., Schlessinger, D., Firman, J., Kummerfeld, S.K., Wood, W.H., 3rd, Zonderman, A.B., Kim, S.K.,  
386 Becker, K.G., 2007. AGEMAP: a gene expression database for aging in mice. *PLoS Genet* 3(11), e201.  
387

## 388 **Figure legends**

389 **Figure 1.** Human hippocampal *Gadd45y* expression is increased during aging and  
390 overexpressing *Gadd45y* in the mouse hippocampus impairs object location memory. **A)**  
391 Correlational analysis between the expression of *Gadd45α*, *Gadd45β* and *Gadd45y* in  
392 human *postmortem* hippocampal tissue and donors' age (N=6). Correlation analysis was  
393 performed using Pearson correlation coefficient or Spearman correlation. **B)** Schematic  
394 representation of the viral constructs used. The viral vector contains a *CamKIIα* promoter  
395 driving *Gadd45y* overexpression (*Gadd45yOE*) or GFP as a control (GFP). **C)** Schematic  
396 representation of the experimental design for behavioral tests. **D)** Representative exploration  
397 patterns of all groups during open field test. **E)** Locomotion analysis of the different groups  
398 measured as the total distance travelled during the open field test (N=8-9). **F)** Anxiety-like  
399 behavior analysis measured as percentage of time spent in the center of the arena during the  
400 open field test (N=8-9). **G)** 24h object location memory test of young adult mice expressing  
401 GFP or *Gadd45yOE* in the dHPC (N=13-15). Dashed line represents equal preference for  
402 either object (chance preference). **H)** 24h contextual fear memory test of young adult mice  
403 expressing GFP or *Gadd45yOE* in the dHPC (N=9). ns: not significant; \*\*p<0.01 by two-tailed  
404 unpaired Student's t-test. Error bars represent SEM.

405

406 **Figure 2.** Increased *Gadd45y* expression dysregulates hippocampal CREB phosphorylation  
407 and activity-dependent gene expression. **A)** Schematic representation of the experimental

408 design for western blot analysis of CREB activation *in vivo*. **B)** Representative immunoblot  
409 scans of hippocampal tissue from young adult mice infected with rAAVs expressing GFP or  
410 Gadd45 $\gamma$ OE using phosphospecific (pCREB) and total CREB (tCREB) antibodies. **C)**  
411 Immunoblot quantification shown as ratios of phosphorylated/total protein normalized to GFP  
412 control (N=5-6). **D)** Schematic representation of the experimental design for western blot  
413 analysis of CREB activation in mouse hippocampal cultures. **E)** Representative immunoblot  
414 scans of hippocampal cultures infected with rAAV expressing GFP or Gadd45 $\gamma$ OE using  
415 phosphospecific and total CREB antibodies. **F)** Immunoblot quantification shown as ratios of  
416 phosphorylated/total protein normalized to uninfected control in baseline or bicuculline-  
417 treated conditions (left and middle graphs) or pCREB fold increase (bicuculline/baseline) for  
418 each condition and normalized to uninfected control (right graph) (N=7-8 independent cell  
419 preparations). **G)** Schematic representation of the experimental design for qRT-PCR analysis  
420 of the expression of CREB-dependent genes (N=5-6 independent cell preparations) **H)** *Arc*,  
421 **I)** *c-Fos* **J)** *FosB* **K)** *Egr1* and **L)** *Npas4* in hippocampal cultures. Hippocampal cultures were  
422 harvested at baseline conditions or after 2h, 4h, or 6h of bicuculline treatment. \*p<0.05,  
423 \*\*p<0.01, \*\*\*p<0.001 and \*\*\*\*p<0.0001 by two-tailed Student's t-test. ns: not significant. Error  
424 bars represent SEM.

425  
426

# Figure 1

## A

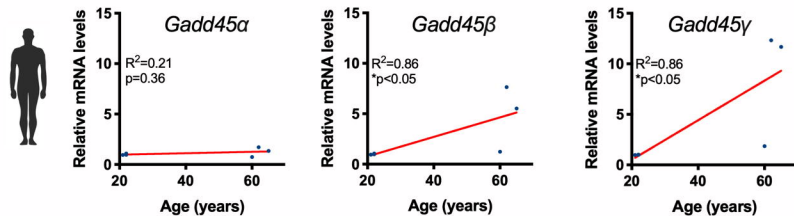

## B

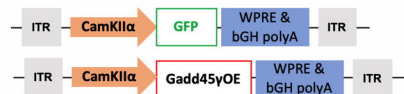

## C

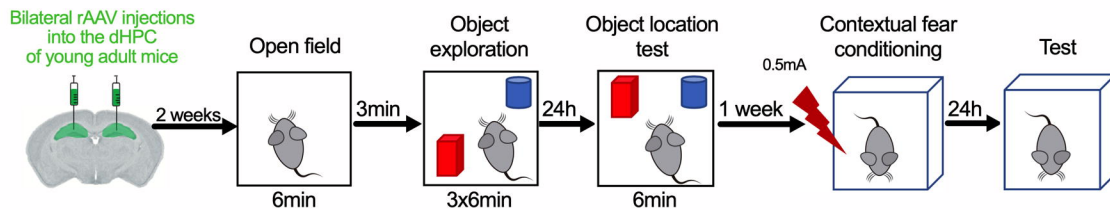

## D

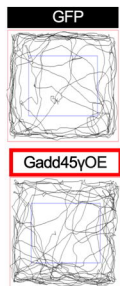

## E

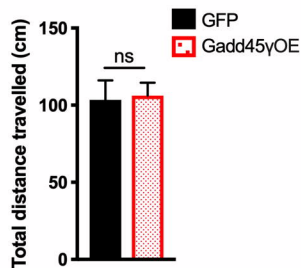

## F

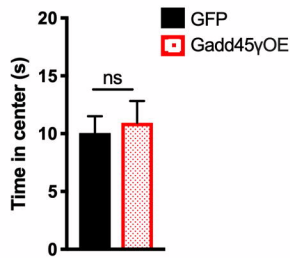

## G

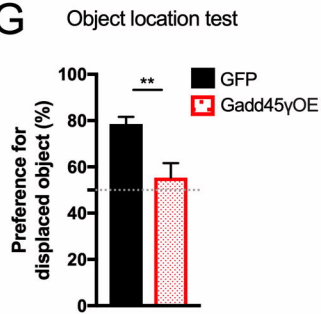

## H

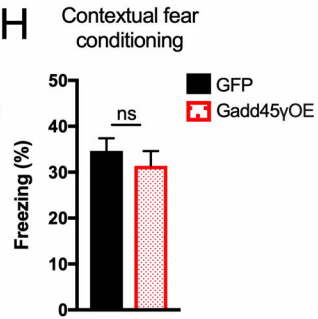

# Figure 2

## A

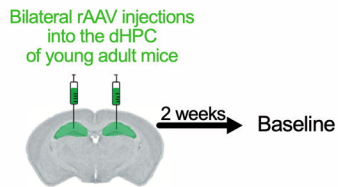

## B

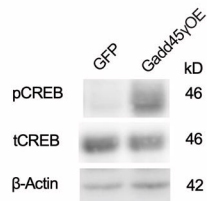

## C

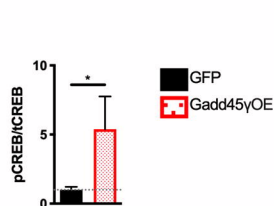

## D

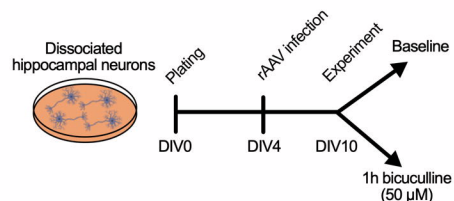

## E

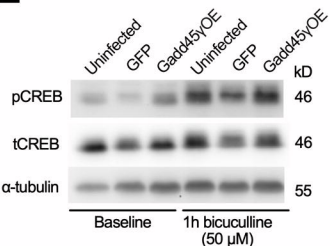

## F

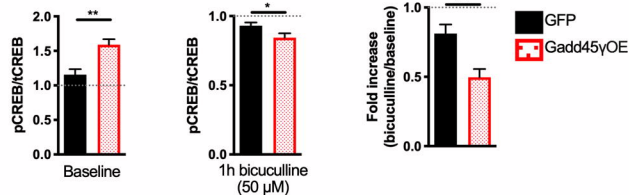

## G

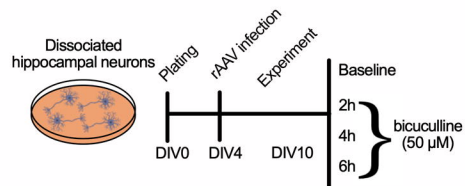

## H

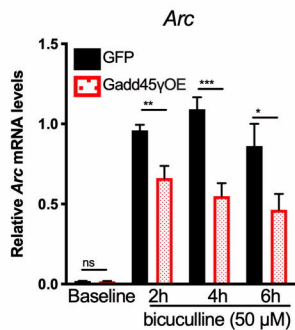

## I

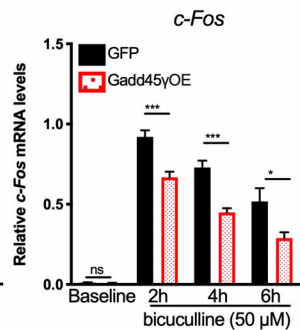

## J

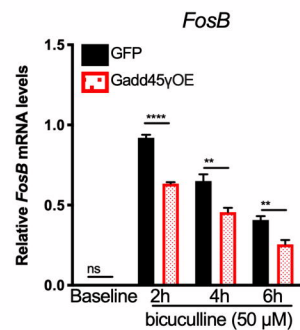

## K

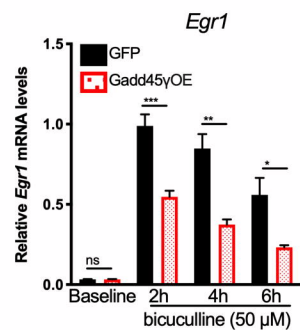

## L

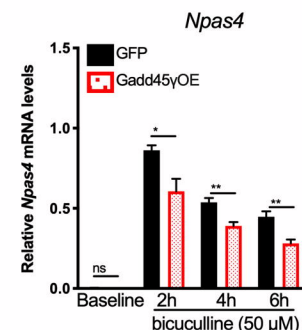

Source: https://www.biorxiv.org/content/10.1101/2020.01.12.903112v2.full.pdf
